# Supplementary material for: UAV-Based Land Cover Classification for Hoverfly (Diptera: Syrphidae) Habitat Condition Assessment: A Case Study on Mt. Stara Planina (Serbia)
Source: MDPI journal article supplement (doi:10.3390/rs13163272), 2021-08-18
Supplement: s1 [file s1]

# UAV-Based Land Cover Classification for Hoverfly (Diptera: Syrphidae) Habitat Condition Assessment: A Case Study on Mt. Stara Planina (Serbia)

Bojana Ivošević<sup>1,\*</sup>, Predrag Lugonja<sup>1</sup>, Sanja Brdar<sup>1</sup>, Mirjana Radulović<sup>1</sup>, Ante Vujčić<sup>2</sup> and João Valente<sup>3</sup>

<sup>1</sup> BioSense Institute – Research Institute for Information Technologies in Biosystems, University of Novi Sad, Novi Sad, Serbia; bojana.ivoševic@biosense.rs; lugonja@biosense.rs; sanja.brdar@biosense.rs; mirjana.radulovic@biosense.rs

<sup>2</sup> Department of Biology and Ecology, Faculty of Sciences, University of Novi Sad, Novi Sad, Serbia; ante.vujic@dbe.uns.ac.rs

<sup>3</sup> Information Technology Group Wageningen University & Research, Wageningen, The Netherlands; joao.valente@wur.nl

\* Correspondence: bojana.ivoševic@biosense.rs

## Supplementary Materials

Supplementary materials include:

- Tables **S1** to **S3** that provide information about sizes of the training and validation sets on three study sites with three experimental repetitions;
- Tables **S4** to **S12** that provide information about the results obtained from three study sites and three experimental repetitions evaluated by additional metrics: precision, recall, and f-score per each class  $k$  calculated with the following equations:

$$precision_k = true\ positive_k / (true\ positive_k + false\ positive_k)$$

$$recall_k = true\ positive_k / (true\ positive_k + false\ p_k)$$

$$F1 - score_k = 2 \times (precision_k \times recall_k) / (precision_k + recall_k)$$

- Table **S13** presents the list of potential richness of hoverfly species for the certain vegetation types;
- Table **S14** presents the list of recent richness of hoverfly species in three designated study sites;
- Zenodo link to raw data (orthomosaics) which enables research repeatability: <https://doi.org/10.5281/zenodo.4482248>
- Zenodo link to instruction video for recreating research results: <https://doi.org/10.5281/zenodo.4482323>

**Table S1.** Dojkinci1 different partitions of training and validation sets.

| Dojkinci1 |          |            |           |             |           |             |
|-----------|----------|------------|-----------|-------------|-----------|-------------|
| class     | Training | Validation | Training1 | Validation1 | Training2 | Validation2 |
| 1         | 2537     | 744        | 2434      | 521         | 2552      | 556         |
| 2         | 2585     | 384        | 2453      | 557         | 2700      | 494         |
| 3         | 2837     | 502        | 2474      | 545         | 2725      | 516         |
| 4         | 2487     | 501        | 2263      | 505         | 2421      | 497         |
| 5         | 2246     | 571        | 2400      | 547         | 2330      | 495         |
| 6         | 1928     | 404        | 2418      | 495         | 2665      | 491         |

|                     |              |             |              |             |              |             |
|---------------------|--------------|-------------|--------------|-------------|--------------|-------------|
| total               | <b>14620</b> | <b>3106</b> | <b>14442</b> | <b>3170</b> | <b>15393</b> | <b>3049</b> |
| sum of all polygons | 345829       |             |              |             |              |             |

**Table S2.** Dojkinci2 different partitions of training and validation sets.

| <b>Dojkinci2</b>    |              |             |              |             |              |             |
|---------------------|--------------|-------------|--------------|-------------|--------------|-------------|
| class               | Training     | Validation  | Training1    | Validation1 | Training2    | Validation2 |
| 1                   | 2905         | 500         | 2805         | 507         | 2573         | 500         |
| 2                   | 3205         | 487         | 2816         | 517         | 2505         | 500         |
| 3                   | 2900         | 500         | 2811         | 509         | 2530         | 500         |
| 4                   | 2976         | 500         | 2607         | 507         | 2976         | 500         |
| 5                   | 2890         | 500         | 2500         | 502         | 2890         | 500         |
| total               | <b>14876</b> | <b>2487</b> | <b>13539</b> | <b>2542</b> | <b>13474</b> | <b>2500</b> |
| sum of all polygons | 340321       |             |              |             |              |             |

**Table S3.** Babin zub different partitions of training and validation sets.

| <b>Babin zub</b>    |             |             |             |             |             |             |
|---------------------|-------------|-------------|-------------|-------------|-------------|-------------|
| class               | Training    | Validation  | Training1   | Validation1 | Training2   | Validation2 |
| 1                   | 1204        | 212         | 1214        | 210         | 1014        | 204         |
| 2                   | 1048        | 190         | 1000        | 200         | 1000        | 200         |
| 3                   | 1200        | 200         | 1002        | 200         | 1000        | 205         |
| 4                   | 1061        | 200         | 1000        | 200         | 1000        | 201         |
| 5                   | 1016        | 206         | 1006        | 200         | 1005        | 200         |
| total               | <b>5529</b> | <b>1008</b> | <b>5222</b> | <b>1010</b> | <b>5019</b> | <b>1010</b> |
| sum of all polygons | 117239      |             |             |             |             |             |

**Table S4.** Precision, recall, and f-score per class for SVM, RF, and k-NN classifiers (corresponding overall accuracy, Kappa index results presented in the manuscript) for Dojkinci1 study site.

| <b>Dojkinci1</b> |       |           |        |         |
|------------------|-------|-----------|--------|---------|
|                  | class | Precision | Recall | F-score |
| SVM              | 1     | 0.97      | 1.00   | 0.98    |
|                  | 2     | 0.74      | 0.62   | 0.68    |
|                  | 3     | 0.74      | 0.90   | 0.81    |
|                  | 4     | 0.91      | 0.96   | 0.94    |
|                  | 5     | 0.97      | 0.91   | 0.94    |
|                  | 6     | 0.94      | 0.81   | 0.87    |
| RF               | 1     | 1.00      | 0.99   | 1.00    |
|                  | 2     | 0.84      | 0.93   | 0.88    |
|                  | 3     | 0.93      | 0.91   | 0.92    |
|                  | 4     | 0.97      | 0.96   | 0.97    |

|      |   |      |      |      |
|------|---|------|------|------|
|      | 5 | 0.99 | 0.97 | 0.98 |
|      | 6 | 0.97 | 0.96 | 0.97 |
| K-NN | 1 | 0.95 | 0.99 | 0.97 |
|      | 2 | 0.77 | 0.72 | 0.74 |
|      | 3 | 0.84 | 0.92 | 0.88 |
|      | 4 | 0.96 | 0.92 | 0.94 |
|      | 5 | 0.98 | 0.91 | 0.94 |
|      | 6 | 0.90 | 0.91 | 0.90 |

**Table S5.** Precision, recall, and f-score per class for SVM, RF, and k-NN classifiers (corresponding overall accuracy, Kappa index results presented in the manuscript) for Dojkinci2 study site.

| Dojkinci2 |       |           |        |         |
|-----------|-------|-----------|--------|---------|
|           | class | Precision | Recall | F-score |
| SVM       | 1     | 0.87      | 0.91   | 0.89    |
|           | 2     | 0.67      | 0.78   | 0.72    |
|           | 3     | 0.77      | 0.74   | 0.75    |
|           | 4     | 0.89      | 0.80   | 0.84    |
|           | 5     | 0.89      | 0.84   | 0.86    |
| RF        | 1     | 0.80      | 0.98   | 0.88    |
|           | 2     | 0.87      | 0.71   | 0.78    |
|           | 3     | 0.81      | 0.93   | 0.87    |
|           | 4     | 0.94      | 0.88   | 0.91    |
|           | 5     | 0.98      | 0.86   | 0.91    |
| K-NN      | 1     | 0.80      | 0.97   | 0.88    |
|           | 2     | 0.81      | 0.51   | 0.62    |
|           | 3     | 0.66      | 0.94   | 0.78    |
|           | 4     | 0.93      | 0.83   | 0.88    |
|           | 5     | 0.97      | 0.83   | 0.89    |

**Table S6.** Precision, recall, and f-score per class for SVM, RF, and k-NN classifiers (corresponding overall accuracy, Kappa index results presented in the manuscript) for Babin zub study site.

| Babin zub |       |           |        |         |
|-----------|-------|-----------|--------|---------|
|           | class | Precision | Recall | F-score |
| SVM       | 1     | 0.92      | 0.91   | 0.91    |
|           | 2     | 0.66      | 0.73   | 0.69    |
|           | 3     | 0.75      | 0.69   | 0.72    |
|           | 4     | 0.98      | 0.98   | 0.98    |
|           | 5     | 0.99      | 1.00   | 0.99    |
| RF        | 1     | 0.93      | 0.94   | 0.93    |

|      |   |      |      |      |
|------|---|------|------|------|
|      | 2 | 0.76 | 0.85 | 0.81 |
|      | 3 | 0.88 | 0.79 | 0.83 |
|      | 4 | 0.98 | 0.98 | 0.98 |
|      | 5 | 1.00 | 0.99 | 1.00 |
|      | 1 | 0.88 | 0.60 | 0.72 |
|      | 2 | 0.59 | 0.89 | 0.71 |
| K-NN | 3 | 0.86 | 0.77 | 0.81 |
|      | 4 | 0.93 | 0.94 | 0.93 |
|      | 5 | 0.99 | 0.96 | 0.98 |

**Table S7.** Precision, recall, and f-score per class for SVM, RF, and k-NN classifiers for the first repetition for Dojkinci1 study site.

| Dojkinci1 |       |           |        |         |
|-----------|-------|-----------|--------|---------|
|           | class | Precision | Recall | F-score |
| SVM       | 1     | 1.00      | 1.00   | 1.00    |
|           | 2     | 0.88      | 0.51   | 0.65    |
|           | 3     | 0.65      | 0.91   | 0.76    |
|           | 4     | 0.99      | 0.74   | 0.85    |
|           | 5     | 0.71      | 0.97   | 0.82    |
|           | 6     | 0.82      | 0.73   | 0.77    |
| RF        | 1     | 1.00      | 1.00   | 1.00    |
|           | 2     | 0.93      | 0.86   | 0.89    |
|           | 3     | 0.86      | 0.86   | 0.86    |
|           | 4     | 0.98      | 0.95   | 0.96    |
|           | 5     | 0.92      | 0.97   | 0.95    |
|           | 6     | 0.82      | 0.86   | 0.84    |
| K-NN      | 1     | 0.98      | 0.99   | 0.98    |
|           | 2     | 0.86      | 0.64   | 0.74    |
|           | 3     | 0.71      | 0.93   | 0.81    |
|           | 4     | 0.98      | 0.92   | 0.95    |
|           | 5     | 0.84      | 0.95   | 0.89    |
|           | 6     | 0.80      | 0.68   | 0.74    |

**Table S8.** Precision, recall, and f-score per class for SVM, RF, and k-NN classifiers for the first repetition for Dojkinci2 study site.

| Dojkinci2 |       |           |        |         |
|-----------|-------|-----------|--------|---------|
|           | class | Precision | Recall | F-score |
| SVM       | 1     | 0.86      | 0.81   | 0.84    |
|           | 2     | 0.61      | 0.66   | 0.63    |

|      |   |      |      |      |
|------|---|------|------|------|
|      | 3 | 0.66 | 0.82 | 0.73 |
|      | 4 | 0.87 | 0.74 | 0.80 |
|      | 5 | 0.82 | 0.72 | 0.77 |
| RF   | 1 | 0.90 | 0.83 | 0.86 |
|      | 2 | 0.72 | 0.82 | 0.77 |
|      | 3 | 0.86 | 0.90 | 0.88 |
|      | 4 | 0.93 | 0.89 | 0.91 |
|      | 5 | 0.94 | 0.87 | 0.91 |
| K-NN | 1 | 0.88 | 0.86 | 0.87 |
|      | 2 | 0.70 | 0.50 | 0.58 |
|      | 3 | 0.61 | 0.94 | 0.74 |
|      | 4 | 0.89 | 0.85 | 0.87 |
|      | 5 | 0.95 | 0.79 | 0.87 |

**Table S9.** Precision, recall, and f-score per class for SVM, RF, and k-NN classifiers for the first repetition for Babin zub study site.

| Babin zub |       |           |        |         |
|-----------|-------|-----------|--------|---------|
|           | class | Precision | Recall | F-score |
| SVM       | 1     | 0.98      | 0.78   | 0.87    |
|           | 2     | 0.66      | 0.77   | 0.71    |
|           | 3     | 0.71      | 0.79   | 0.75    |
|           | 4     | 0.97      | 0.92   | 0.95    |
|           | 5     | 1.00      | 1.00   | 1.00    |
| RF        | 1     | 0.97      | 0.92   | 0.94    |
|           | 2     | 0.77      | 0.83   | 0.80    |
|           | 3     | 0.81      | 0.80   | 0.81    |
|           | 4     | 0.98      | 0.97   | 0.98    |
|           | 5     | 1.00      | 1.00   | 1.00    |
| K-NN      | 1     | 0.89      | 0.57   | 0.69    |
|           | 2     | 0.59      | 0.80   | 0.68    |
|           | 3     | 0.73      | 0.79   | 0.76    |
|           | 4     | 0.95      | 0.93   | 0.94    |
|           | 5     | 1.00      | 0.99   | 0.99    |

**Table S10.** Precision, recall, and f-score per class for SVM, RF, and k-NN classifiers for the second repetition for Dojkinci1 study site.

| Dojkinci1 |       |           |        |         |
|-----------|-------|-----------|--------|---------|
|           | class | Precision | Recall | F-score |
| SVM       | 1     | 0.94      | 1.00   | 0.97    |

|      |   |      |      |      |
|------|---|------|------|------|
|      | 2 | 0.81 | 0.73 | 0.77 |
|      | 3 | 0.84 | 0.92 | 0.88 |
|      | 4 | 0.98 | 0.96 | 0.97 |
|      | 5 | 0.86 | 0.96 | 0.91 |
|      | 6 | 0.90 | 0.77 | 0.83 |
| RF   | 1 | 0.98 | 0.99 | 0.98 |
|      | 2 | 0.91 | 0.96 | 0.93 |
|      | 3 | 0.98 | 0.95 | 0.97 |
|      | 4 | 0.97 | 0.98 | 0.97 |
|      | 5 | 0.99 | 0.97 | 0.99 |
|      | 6 | 0.98 | 0.96 | 0.97 |
| K-NN | 1 | 0.94 | 0.99 | 0.97 |
|      | 2 | 0.87 | 0.91 | 0.89 |
|      | 3 | 0.97 | 0.97 | 0.97 |
|      | 4 | 0.98 | 0.95 | 0.96 |
|      | 5 | 0.98 | 0.94 | 0.96 |
|      | 6 | 0.93 | 0.87 | 0.90 |

**Table S11.** Precision, recall, and f-score per class for SVM, RF, and k-NN classifiers for the second repetition for Dojkinci2 study site.

| Dojkinci2 |       |           |        |         |
|-----------|-------|-----------|--------|---------|
|           | class | Precision | Recall | F-score |
| SVM       | 1     | 0.93      | 0.78   | 0.85    |
|           | 2     | 0.67      | 0.72   | 0.69    |
|           | 3     | 0.83      | 0.91   | 0.87    |
|           | 4     | 0.89      | 0.84   | 0.86    |
|           | 5     | 0.84      | 0.89   | 0.87    |
| RF        | 1     | 0.89      | 0.82   | 0.85    |
|           | 2     | 0.73      | 0.81   | 0.77    |
|           | 3     | 0.92      | 0.85   | 0.89    |
|           | 4     | 0.93      | 0.93   | 0.93    |
|           | 5     | 0.90      | 0.93   | 0.92    |
| K-NN      | 1     | 0.86      | 0.84   | 0.85    |
|           | 2     | 0.66      | 0.62   | 0.64    |
|           | 3     | 0.80      | 0.85   | 0.83    |
|           | 4     | 0.91      | 0.88   | 0.89    |
|           | 5     | 0.84      | 0.90   | 0.87    |

**Table S12.** Precision, recall, and f-score per class for SVM, RF, and k-NN classifiers for the second repetition for Babin zub study site.

| Babin zub |       |           |        |         |
|-----------|-------|-----------|--------|---------|
|           | class | Precision | Recall | F-score |
| SVM       | 1     | 0.94      | 0.84   | 0.89    |
|           | 2     | 0.71      | 0.75   | 0.73    |
|           | 3     | 0.78      | 0.78   | 0.78    |
|           | 4     | 0.90      | 0.95   | 0.92    |
|           | 5     | 1.00      | 1.00   | 1.00    |
| RF        | 1     | 0.96      | 0.94   | 0.95    |
|           | 2     | 0.78      | 0.85   | 0.81    |
|           | 3     | 0.86      | 0.76   | 0.81    |
|           | 4     | 0.92      | 0.98   | 0.95    |
|           | 5     | 1.00      | 1.00   | 1.00    |
| K-NN      | 1     | 0.88      | 0.52   | 0.66    |
|           | 2     | 0.56      | 0.79   | 0.66    |
|           | 3     | 0.75      | 0.76   | 0.76    |
|           | 4     | 0.94      | 0.93   | 0.93    |
|           | 5     | 0.99      | 0.99   | 0.99    |

**Table 13.** The list of potential richness of hoverfly species for the certain vegetation types: A, vegetation type of alpine, subalpine, and oro-Mediterranean vegetation; B, montane spruce and mixed spruce forests; and E, the vegetation type of beech and mixed beech forests. 0 indicates the absence of the species, 1 indicates the presence of the species.

| Hoverfly species              | A | B | E |
|-------------------------------|---|---|---|
| <i>Brachyopa_dorsata</i>      | 0 | 0 | 1 |
| <i>Brachyopa_insensilis</i>   | 0 | 0 | 1 |
| <i>Brachyopa_plena</i>        | 0 | 0 | 1 |
| <i>Callicera_aurata</i>       | 0 | 0 | 1 |
| <i>Callicera_fagesii</i>      | 0 | 0 | 1 |
| <i>Callicera_spinolae</i>     | 0 | 0 | 1 |
| <i>Ceriana_conopsoides</i>    | 0 | 0 | 1 |
| <i>Cheilosia_pascuorum</i>    | 0 | 0 | 1 |
| <i>Cheilosia_redi</i>         | 0 | 0 | 1 |
| <i>Chrysotoxum_festivum</i>   | 0 | 0 | 1 |
| <i>Criorhina_asilica</i>      | 0 | 0 | 1 |
| <i>Criorhina_floccosa</i>     | 0 | 0 | 1 |
| <i>Doros_destillatorius</i>   | 0 | 0 | 1 |
| <i>Epistrophella_euchroma</i> | 0 | 0 | 1 |
| <i>Eristalis_tecta</i>        | 0 | 0 | 1 |
| <i>Eumerus_clavatus</i>       | 0 | 0 | 1 |

|                                    |   |   |   |
|------------------------------------|---|---|---|
| <i>Eumerus flavitarsis</i>         | 0 | 0 | 1 |
| <i>Eupeodes goeldlini</i>          | 0 | 0 | 1 |
| <i>Eupeodes lucasi</i>             | 0 | 0 | 1 |
| <i>Ferdinandea aurea</i>           | 0 | 0 | 1 |
| <i>Heringia heringi</i>            | 0 | 0 | 1 |
| <i>Mallota cimbiciformis</i>       | 0 | 0 | 1 |
| <i>Mallota fuciformis</i>          | 0 | 0 | 1 |
| <i>Melanogaster curvistylus</i>    | 0 | 0 | 1 |
| <i>Meligramma guttata</i>          | 0 | 0 | 1 |
| <i>Meligramma triangulifera</i>    | 0 | 0 | 1 |
| <i>Merodon auripes</i>             | 0 | 0 | 1 |
| <i>Merodon kozufensis in litt.</i> | 0 | 0 | 1 |
| <i>Merodon loewi</i>               | 0 | 0 | 1 |
| <i>Merodon olympi</i>              | 0 | 0 | 1 |
| <i>Merodon orjeniesis in litt.</i> | 0 | 0 | 1 |
| <i>Merodon rufus</i>               | 0 | 0 | 1 |
| <i>Milesia crabroniformis</i>      | 0 | 0 | 1 |
| <i>Milesia semiluctifera</i>       | 0 | 0 | 1 |
| <i>Myolepta dubia</i>              | 0 | 0 | 1 |
| <i>Myolepta obscura</i>            | 0 | 0 | 1 |
| <i>Myolepta potens</i>             | 0 | 0 | 1 |
| <i>Myolepta vara</i>               | 0 | 0 | 1 |
| <i>Orthonевра nobilis</i>          | 0 | 0 | 1 |
| <i>Paragus tibialis</i>            | 0 | 0 | 1 |
| <i>Pipiza austriaca</i>            | 0 | 0 | 1 |
| <i>Pipiza carbonaria</i>           | 0 | 0 | 1 |
| <i>Pipiza festiva</i>              | 0 | 0 | 1 |
| <i>Pipiza luteitarsis</i>          | 0 | 0 | 1 |
| <i>Sphiximorpha subsessilis</i>    | 0 | 0 | 1 |
| <i>Spilomyia manicata</i>          | 0 | 0 | 1 |
| <i>Spilomyia saltuum</i>           | 0 | 0 | 1 |
| <i>Temnostoma meridionale</i>      | 0 | 0 | 1 |
| <i>Temnostoma vespiforme</i>       | 0 | 0 | 1 |
| <i>Volucella inflata</i>           | 0 | 0 | 1 |
| <i>Xanthogramma stackelbergi</i>   | 0 | 0 | 1 |
| <i>Xylota florum</i>               | 0 | 0 | 1 |
| <i>Xylota tarda</i>                | 0 | 0 | 1 |
| <i>Cheilosia herculana</i>         | 1 | 0 | 0 |
| <i>Cheilosia melanura rubra</i>    | 0 | 0 | 0 |
| <i>Eumerus montanum</i>            | 0 | 0 | 0 |
| <i>Merodon rasicus</i>             | 1 | 0 | 0 |



|                                        |   |   |   |
|----------------------------------------|---|---|---|
| <i>Paragus_kopdagensis</i>             | 1 | 0 | 0 |
| <i>Callicera_macquarti</i>             | 0 | 0 | 1 |
| <i>Chalcosyrphus_nemorum</i>           | 0 | 0 | 1 |
| <i>Chalcosyrphus_rufipes</i>           | 0 | 0 | 1 |
| <i>Cheilosia_kerteszi</i>              | 0 | 0 | 1 |
| <i>Cheilosia_laticornis</i>            | 1 | 0 | 1 |
| <i>Cheilosia_psilophthalma</i>         | 0 | 0 | 1 |
| <i>Chrysogaster_basalis</i>            | 0 | 0 | 1 |
| <i>Criorhina_pachymera</i>             | 1 | 0 | 1 |
| <i>Epistrophe_melanostoma</i>          | 0 | 0 | 1 |
| <i>Eumerus_ornatus</i>                 | 1 | 0 | 1 |
| <i>Merodon_calidus</i>                 | 1 | 0 | 1 |
| <i>Merodon_omediterraneus_in_litt.</i> | 1 | 0 | 1 |
| <i>Paragus_bradesi</i>                 | 1 | 0 | 1 |
| <i>Chamaesyrphus_lusitanicus</i>       | 0 | 0 | 0 |
| <i>Psilota_atra</i>                    | 0 | 0 | 0 |
| <i>Brachyopa_bicolor</i>               | 0 | 0 | 1 |
| <i>Brachyopa_maculipennis</i>          | 0 | 0 | 1 |
| <i>Brachyopa_panzeri</i>               | 0 | 0 | 1 |
| <i>Brachyopa_pilosa</i>                | 0 | 0 | 1 |
| <i>Brachyopa_testacea</i>              | 0 | 0 | 1 |
| <i>Brachyopa_vittata</i>               | 0 | 0 | 1 |
| <i>Cheilosia_aerea</i>                 | 0 | 1 | 1 |
| <i>Cheilosia_cynocephala</i>           | 0 | 0 | 1 |
| <i>Cheilosia_lenta</i>                 | 0 | 0 | 1 |
| <i>Cheilosia_soror</i>                 | 0 | 1 | 1 |
| <i>Dasysyrphus_eggeri</i>              | 0 | 0 | 1 |
| <i>Eupeodes_bucculatus</i>             | 0 | 1 | 1 |
| <i>Ferdinanda_cuprea</i>               | 0 | 0 | 1 |
| <i>Lejogaster_tarsata</i>              | 0 | 0 | 1 |
| <i>Merodon_nigritarsis</i>             | 0 | 1 | 1 |
| <i>Merodon_ruficornis</i>              | 0 | 1 | 1 |
| <i>Neocnemodon_vitripennis</i>         | 0 | 0 | 1 |
| <i>Orthonevra_frontalis</i>            | 0 | 0 | 1 |
| <i>Paragus_albifrons</i>               | 0 | 1 | 1 |
| <i>Pipiza_fasciata</i>                 | 0 | 0 | 1 |
| <i>Platycheirus_scutatus</i>           | 0 | 1 | 1 |
| <i>Temnostoma_bombylans</i>            | 0 | 0 | 1 |
| <i>Volucella_zonaria</i>               | 0 | 1 | 1 |
| <i>Callicera_rufa</i>                  | 0 | 0 | 0 |
| <i>Cheilosia_ahenea</i>                | 0 | 0 | 0 |

|                                    |   |   |   |
|------------------------------------|---|---|---|
| <i>Cheilosia_faucis</i>            | 0 | 0 | 0 |
| <i>Cheilosia_laeviseta</i>         | 1 | 1 | 0 |
| <i>Cheilosia_laeviventris</i>      | 0 | 0 | 0 |
| <i>Cheilosia_loewi</i>             | 0 | 0 | 0 |
| <i>Cheilosia_pictipennis</i>       | 1 | 1 | 0 |
| <i>Cheilosia_sahlbergi</i>         | 0 | 0 | 0 |
| <i>Cheilosia_vujici</i>            | 1 | 1 | 0 |
| <i>Chrysogaster_coemiteriorum</i>  | 0 | 0 | 0 |
| <i>Chrysotoxum_orthostylum</i>     | 1 | 1 | 0 |
| <i>Eupeodes_tiroiensis</i>         | 1 | 1 | 0 |
| <i>Melanogaster_aerosa</i>         | 0 | 0 | 0 |
| <i>Merodon_aureus</i>              | 1 | 1 | 0 |
| <i>Paragus_absidatus</i>           | 1 | 1 | 0 |
| <i>Paragus_finitimus</i>           | 1 | 1 | 0 |
| <i>Paragus_punctulatus</i>         | 1 | 1 | 0 |
| <i>Pelecocera_tricincta</i>        | 1 | 1 | 0 |
| <i>Pipizella_bispina</i>           | 1 | 1 | 0 |
| <i>Platycheirus_angustatus</i>     | 0 | 0 | 0 |
| <i>Platycheirus_angustipes</i>     | 0 | 0 | 0 |
| <i>Platycheirus_manicatus</i>      | 1 | 1 | 0 |
| <i>Platycheirus_melanopsis</i>     | 1 | 1 | 0 |
| <i>Platycheirus_meridimontanus</i> | 1 | 1 | 0 |
| <i>Platycheirus_tatricus</i>       | 0 | 0 | 0 |
| <i>Sphaerophoria_laurae</i>        | 1 | 1 | 0 |
| <i>Spilomyia_triangularata</i>     | 0 | 0 | 0 |
| <i>Arctophila_bombiformis</i>      | 0 | 0 | 1 |
| <i>Arctophila_superbiens</i>       | 0 | 0 | 1 |
| <i>Baccha_elongata</i>             | 1 | 1 | 1 |
| <i>Blera_fallax</i>                | 0 | 0 | 1 |
| <i>Brachypalpoides_lentus</i>      | 0 | 0 | 1 |
| <i>Brachypalpus_chrysites</i>      | 0 | 0 | 1 |
| <i>Brachypalpus_laphriformis</i>   | 0 | 0 | 1 |
| <i>Brachypalpus_valgus</i>         | 1 | 1 | 1 |
| <i>Caliprobola_speciosa</i>        | 0 | 0 | 1 |
| <i>Callicera_aenea</i>             | 0 | 0 | 1 |
| <i>Chalcosyrphus_eunotus</i>       | 0 | 0 | 1 |
| <i>Chalcosyrphus_piger</i>         | 0 | 0 | 1 |
| <i>Chalcosyrphus_valgus</i>        | 0 | 0 | 1 |
| <i>Chamaesyrphus_caledonicus</i>   | 0 | 0 | 1 |
| <i>Chamaesyrphus_scaevoides</i>    | 0 | 0 | 1 |
| <i>Cheilosia_alba</i>              | 0 | 0 | 1 |

|                               |   |   |   |
|-------------------------------|---|---|---|
| <i>Cheilosia_albipila</i>     | 0 | 0 | 1 |
| <i>Cheilosia_albitarsis</i>   | 1 | 1 | 1 |
| <i>Cheilosia_antiqua</i>      | 1 | 1 | 1 |
| <i>Cheilosia_balkana</i>      | 0 | 0 | 1 |
| <i>Cheilosia_barbafacies</i>  | 0 | 0 | 1 |
| <i>Cheilosia_barbata</i>      | 1 | 1 | 1 |
| <i>Cheilosia_bergenstammi</i> | 0 | 0 | 1 |
| <i>Cheilosia_bracusi</i>      | 0 | 0 | 1 |
| <i>Cheilosia_caerulescens</i> | 1 | 1 | 1 |
| <i>Cheilosia_canicularis</i>  | 0 | 0 | 1 |
| <i>Cheilosia_carbonaria</i>   | 0 | 0 | 1 |
| <i>Cheilosia_chloris</i>      | 0 | 0 | 1 |
| <i>Cheilosia_chrysocoma</i>   | 0 | 0 | 1 |
| <i>Cheilosia_clama</i>        | 0 | 0 | 1 |
| <i>Cheilosia_derasa</i>       | 1 | 1 | 1 |
| <i>Cheilosia_fasciata</i>     | 0 | 0 | 1 |
| <i>Cheilosia_flavipes</i>     | 1 | 1 | 1 |
| <i>Cheilosia_fraterna</i>     | 0 | 0 | 1 |
| <i>Cheilosia_frontalis</i>    | 1 | 1 | 1 |
| <i>Cheilosia_gagatea</i>      | 1 | 1 | 1 |
| <i>Cheilosia_gigantea</i>     | 1 | 1 | 1 |
| <i>Cheilosia_grisella</i>     | 1 | 1 | 1 |
| <i>Cheilosia_grossa</i>       | 0 | 0 | 1 |
| <i>Cheilosia_hercyniae</i>    | 1 | 1 | 1 |
| <i>Cheilosia_himantopus</i>   | 0 | 0 | 1 |
| <i>Cheilosia_illustrata</i>   | 1 | 1 | 1 |
| <i>Cheilosia_impressa</i>     | 1 | 1 | 1 |
| <i>Cheilosia_insignis</i>     | 1 | 1 | 1 |
| <i>Cheilosia_lasiopa</i>      | 0 | 0 | 1 |
| <i>Cheilosia_lenis</i>        | 0 | 0 | 1 |
| <i>Cheilosia_longula</i>      | 0 | 0 | 1 |
| <i>Cheilosia_melanopa</i>     | 1 | 1 | 1 |
| <i>Cheilosia_melanura</i>     | 1 | 1 | 1 |
| <i>Cheilosia_morio</i>        | 0 | 0 | 1 |
| <i>Cheilosia_mutabilis</i>    | 1 | 1 | 1 |
| <i>Cheilosia_nebulosa</i>     | 0 | 0 | 1 |
| <i>Cheilosia_nigripes</i>     | 1 | 1 | 1 |
| <i>Cheilosia_orthotricha</i>  | 0 | 0 | 1 |
| <i>Cheilosia_pagana</i>       | 0 | 0 | 1 |
| <i>Cheilosia_personata</i>    | 1 | 1 | 1 |
| <i>Cheilosia_pini</i>         | 0 | 0 | 1 |

|                                  |   |   |   |
|----------------------------------|---|---|---|
| <i>Cheilosia_proxima</i>         | 1 | 1 | 1 |
| <i>Cheilosia_pubera</i>          | 1 | 1 | 1 |
| <i>Cheilosia_ranunculi</i>       | 0 | 0 | 1 |
| <i>Cheilosia_rhynchops</i>       | 1 | 1 | 1 |
| <i>Cheilosia_rufimana</i>        | 0 | 0 | 1 |
| <i>Cheilosia_scanica</i>         | 0 | 0 | 1 |
| <i>Cheilosia_scutellata</i>      | 1 | 1 | 1 |
| <i>Cheilosia_semifasciata</i>    | 0 | 0 | 1 |
| <i>Cheilosia_subpictipennis</i>  | 1 | 1 | 1 |
| <i>Cheilosia_urbana</i>          | 0 | 0 | 1 |
| <i>Cheilosia_uviformis</i>       | 0 | 0 | 1 |
| <i>Cheilosia_variabilis</i>      | 0 | 0 | 1 |
| <i>Cheilosia_velutina</i>        | 0 | 0 | 1 |
| <i>Cheilosia_vernalis</i>        | 1 | 1 | 1 |
| <i>Cheilosia_vicina</i>          | 1 | 1 | 1 |
| <i>Cheilosia_vulpina</i>         | 0 | 0 | 1 |
| <i>Chrysogaster_solstitialis</i> | 0 | 0 | 1 |
| <i>Chrysotoxum_bicinctum</i>     | 1 | 1 | 1 |
| <i>Chrysotoxum_cautum</i>        | 1 | 1 | 1 |
| <i>Chrysotoxum_elegans</i>       | 1 | 1 | 1 |
| <i>Chrysotoxum_fasciatum</i>     | 1 | 1 | 1 |
| <i>Chrysotoxum_fasciolatum</i>   | 1 | 1 | 1 |
| <i>Chrysotoxum_montanum</i>      | 1 | 1 | 1 |
| <i>Chrysotoxum_octomaculatum</i> | 1 | 1 | 1 |
| <i>Chrysotoxum_tomentosum</i>    | 1 | 1 | 1 |
| <i>Chrysotoxum_vernale</i>       | 1 | 1 | 1 |
| <i>Chrysotoxum_verralli</i>      | 1 | 1 | 1 |
| <i>Criorhina_berberina</i>       | 1 | 1 | 1 |
| <i>Criorhina_ranunculi</i>       | 1 | 1 | 1 |
| <i>Dasysyrphus_albostriatus</i>  | 1 | 1 | 1 |
| <i>Dasysyrphus_friuliensis</i>   | 0 | 0 | 1 |
| <i>Dasysyrphus_hilaris</i>       | 0 | 0 | 1 |
| <i>Dasysyrphus_lenensis</i>      | 0 | 0 | 1 |
| <i>Dasysyrphus_pauxillus</i>     | 0 | 0 | 1 |
| <i>Dasysyrphus_pinastri</i>      | 0 | 0 | 1 |
| <i>Dasysyrphus_postclaviger</i>  | 0 | 1 | 1 |
| <i>Dasysyrphus_tricinctus</i>    | 1 | 1 | 1 |
| <i>Dasysyrphus_venustus</i>      | 0 | 0 | 1 |
| <i>Didea_alneti</i>              | 0 | 0 | 1 |
| <i>Didea_fasciata</i>            | 1 | 1 | 1 |
| <i>Didea_intermedia</i>          | 0 | 0 | 1 |

|                                   |   |   |   |
|-----------------------------------|---|---|---|
| <i>Doros_profuges</i>             | 0 | 0 | 1 |
| <i>Epistrophe_diaphana</i>        | 0 | 0 | 1 |
| <i>Epistrophe_eligans</i>         | 0 | 0 | 1 |
| <i>Epistrophe_flava</i>           | 0 | 0 | 1 |
| <i>Epistrophe_grossulariae</i>    | 0 | 0 | 1 |
| <i>Epistrophe_leiophthalma</i>    | 1 | 1 | 1 |
| <i>Epistrophe_nitidicollis</i>    | 1 | 1 | 1 |
| <i>Episyrrhus_balteatus</i>       | 1 | 1 | 1 |
| <i>Eriozona_syrphoides</i>        | 1 | 1 | 1 |
| <i>Eristalinus_aeneus</i>         | 0 | 0 | 1 |
| <i>Eristalinus_sepulchralis</i>   | 0 | 0 | 1 |
| <i>Eristalis_alpina</i>           | 1 | 1 | 1 |
| <i>Eristalis_arbustorum</i>       | 1 | 1 | 1 |
| <i>Eristalis_horticola</i>        | 1 | 1 | 1 |
| <i>Eristalis_intricaria</i>       | 1 | 1 | 1 |
| <i>Eristalis_jugorum</i>          | 1 | 1 | 1 |
| <i>Eristalis_nemorum</i>          | 0 | 0 | 1 |
| <i>Eristalis_pertinax</i>         | 1 | 1 | 1 |
| <i>Eristalis_picea</i>            | 0 | 0 | 1 |
| <i>Eristalis_rupium</i>           | 1 | 1 | 1 |
| <i>Eristalis_similis</i>          | 1 | 1 | 1 |
| <i>Eristalis_tenax</i>            | 1 | 1 | 1 |
| <i>Eumerus_alpinus</i>            | 0 | 0 | 1 |
| <i>Eumerus_grandis</i>            | 1 | 1 | 1 |
| <i>Eumerus_tarsalis</i>           | 1 | 1 | 1 |
| <i>Eumerus_tricolor</i>           | 1 | 1 | 1 |
| <i>Eupeodes_corollae</i>          | 1 | 1 | 1 |
| <i>Eupeodes_luniger</i>           | 1 | 1 | 1 |
| <i>Eupeodes_nielseni</i>          | 1 | 1 | 1 |
| <i>Eupeodes_nitens</i>            | 1 | 1 | 1 |
| <i>Hammerschmidtia_ferruginea</i> | 0 | 0 | 1 |
| <i>Helophilus_pendulus</i>        | 0 | 0 | 1 |
| <i>Helophilus_trivittatus</i>     | 0 | 0 | 1 |
| <i>Lapposyrphus_lapponicus</i>    | 1 | 1 | 1 |
| <i>Lejota_ruficornis</i>          | 0 | 0 | 1 |
| <i>Leucozona_inopinata</i>        | 1 | 1 | 1 |
| <i>Leucozona_laternaria</i>       | 1 | 1 | 1 |
| <i>Leucozona_lucorum</i>          | 1 | 1 | 1 |
| <i>Megasyrphus_erraticus</i>      | 0 | 0 | 1 |
| <i>Melangyna_barbifrons</i>       | 1 | 1 | 1 |
| <i>Melangyna_compositarum</i>     | 0 | 0 | 1 |

|                                   |   |   |   |
|-----------------------------------|---|---|---|
| <i>Melangyna_lasiophthalma</i>    | 0 | 0 | 1 |
| <i>Melangyna_lucifera</i>         | 1 | 1 | 1 |
| <i>Melangyna_quadrimaculata</i>   | 0 | 0 | 1 |
| <i>Melangyna_umbellatarum</i>     | 0 | 0 | 1 |
| <i>Melanogaster_nuda</i>          | 0 | 0 | 1 |
| <i>Melanogaster_parumplicata</i>  | 0 | 0 | 1 |
| <i>Melanostoma_mellinum</i>       | 1 | 1 | 1 |
| <i>Melanostoma_scalare</i>        | 1 | 1 | 1 |
| <i>Meligramma_cincta</i>          | 1 | 1 | 1 |
| <i>Meligramma_cingulata</i>       | 0 | 0 | 1 |
| <i>Meliscaeva_auricollis</i>      | 1 | 1 | 1 |
| <i>Meliscaeva_cinctella</i>       | 1 | 1 | 1 |
| <i>Merodon_aberrans</i>           | 0 | 0 | 1 |
| <i>Merodon_aerarius</i>           | 1 | 1 | 1 |
| <i>Merodon_armipes</i>            | 1 | 1 | 1 |
| <i>Merodon_balkanicus</i>         | 1 | 1 | 1 |
| <i>Merodon_bessarabicus</i>       | 1 | 1 | 1 |
| <i>Merodon_constans</i>           | 0 | 0 | 1 |
| <i>Merodon_desuturinus</i>        | 1 | 1 | 1 |
| <i>Merodon_equestris</i>          | 0 | 0 | 1 |
| <i>Merodon_flavus</i>             | 0 | 0 | 1 |
| <i>Merodon_moenium</i>            | 1 | 1 | 1 |
| <i>Merodon_moesiacus_in_litt.</i> | 1 | 1 | 1 |
| <i>Merodon_obscuritarsis</i>      | 1 | 1 | 1 |
| <i>Merodon_trebevicensis</i>      | 0 | 0 | 1 |
| <i>Merodon_virgatus</i>           | 1 | 1 | 1 |
| <i>Microdon_analis</i>            | 1 | 1 | 1 |
| <i>Microdon_devius</i>            | 1 | 1 | 1 |
| <i>Microdon_mutabilis</i>         | 1 | 1 | 1 |
| <i>Myathropa_florea</i>           | 1 | 1 | 1 |
| <i>Neoascia_annexa</i>            | 0 | 0 | 1 |
| <i>Neoascia_interrupta</i>        | 0 | 0 | 1 |
| <i>Neoascia_meticulosa</i>        | 0 | 0 | 1 |
| <i>Neoascia_obliqua</i>           | 0 | 0 | 1 |
| <i>Neoascia_podagrica</i>         | 0 | 0 | 1 |
| <i>Neoascia_tenur</i>             | 0 | 0 | 1 |
| <i>Neoascia_unifasciata</i>       | 0 | 0 | 1 |
| <i>Neocnemodon_brevidens</i>      | 0 | 0 | 1 |
| <i>Neocnemodon_larusi</i>         | 0 | 0 | 1 |
| <i>Neocnemodon_latitarsis</i>     | 0 | 0 | 1 |
| <i>Neocnemodon_pubescens</i>      | 0 | 0 | 1 |

|                                   |   |   |   |
|-----------------------------------|---|---|---|
| <i>Orthonevra_montana</i>         | 0 | 0 | 1 |
| <i>Paragus_constrictus</i>        | 0 | 0 | 1 |
| <i>Paragus_haemorrhous</i>        | 1 | 1 | 1 |
| <i>Paragus_majoranae</i>          | 1 | 1 | 1 |
| <i>Paragus_pecchiolii</i>         | 1 | 1 | 1 |
| <i>Paragus_testaceus</i>          | 1 | 1 | 1 |
| <i>Parasyrphus_annulatus</i>      | 1 | 1 | 1 |
| <i>Parasyrphus_lineolus</i>       | 1 | 1 | 1 |
| <i>Parasyrphus_macularis</i>      | 1 | 1 | 1 |
| <i>Parasyrphus_mallineus</i>      | 1 | 1 | 1 |
| <i>Parasyrphus_nigritarsis</i>    | 1 | 1 | 1 |
| <i>Parasyrphus_punctulatus</i>    | 1 | 1 | 1 |
| <i>Parasyrphus_vittiger</i>       | 1 | 1 | 1 |
| <i>Pipiza_noctiluca</i>           | 0 | 0 | 1 |
| <i>Pipiza_notata</i>              | 0 | 0 | 1 |
| <i>Pipiza_quadrimaculata</i>      | 1 | 1 | 1 |
| <i>Pipizella_annulata</i>         | 1 | 1 | 1 |
| <i>Pipizella_divicoi</i>          | 1 | 1 | 1 |
| <i>Pipizella_pennina</i>          | 1 | 1 | 1 |
| <i>Pipizella_viduata</i>          | 1 | 1 | 1 |
| <i>Pipizella_virens</i>           | 1 | 1 | 1 |
| <i>Platycheirus_albimanus</i>     | 1 | 1 | 1 |
| <i>Platycheirus_ambiguus</i>      | 0 | 0 | 1 |
| <i>Platycheirus_aurolateralis</i> | 0 | 0 | 1 |
| <i>Platycheirus_brunnifrons</i>   | 0 | 0 | 1 |
| <i>Platycheirus_clypeatus</i>     | 0 | 0 | 1 |
| <i>Platycheirus_complicatus</i>   | 0 | 0 | 1 |
| <i>Platycheirus_discimanus</i>    | 1 | 1 | 1 |
| <i>Platycheirus_europaeus</i>     | 0 | 0 | 1 |
| <i>Platycheirus_fulviventris</i>  | 0 | 0 | 1 |
| <i>Platycheirus_immaculatus</i>   | 0 | 0 | 1 |
| <i>Platycheirus_muelleri</i>      | 0 | 0 | 1 |
| <i>Platycheirus_nielsenii</i>     | 1 | 1 | 1 |
| <i>Platycheirus_occultus</i>      | 0 | 1 | 1 |
| <i>Platycheirus_parmatus</i>      | 1 | 1 | 1 |
| <i>Platycheirus_peltatus</i>      | 0 | 0 | 1 |
| <i>Platycheirus_splendidus</i>    | 1 | 1 | 1 |
| <i>Platycheirus_sticticus</i>     | 0 | 0 | 1 |
| <i>Platycheirus_tarsalis</i>      | 1 | 1 | 1 |
| <i>Platycheirus_transfugus</i>    | 0 | 0 | 1 |
| <i>Pocota_personata</i>           | 0 | 0 | 1 |

|                                   |   |   |   |
|-----------------------------------|---|---|---|
| <i>Portevinia_maculata</i>        | 0 | 0 | 1 |
| <i>Psilota_anthracina</i>         | 0 | 0 | 1 |
| <i>Rhingia_borealis</i>           | 1 | 1 | 1 |
| <i>Rhingia_campestris</i>         | 1 | 1 | 1 |
| <i>Rhingia_rostrata</i>           | 0 | 0 | 1 |
| <i>Scaeva_dignota</i>             | 1 | 1 | 1 |
| <i>Scaeva_pyrastri</i>            | 1 | 1 | 1 |
| <i>Scaeva_selenitica</i>          | 1 | 1 | 1 |
| <i>Sericomyia_lappona</i>         | 0 | 0 | 1 |
| <i>Sericomyia_silentis</i>        | 0 | 0 | 1 |
| <i>Spazigaster_ambulans</i>       | 0 | 0 | 1 |
| <i>Sphaerophoria_bankowskiae</i>  | 1 | 1 | 1 |
| <i>Sphaerophoria_batava</i>       | 1 | 1 | 1 |
| <i>Sphaerophoria_interrupta</i>   | 1 | 1 | 1 |
| <i>Sphaerophoria_rueppelli</i>    | 1 | 1 | 1 |
| <i>Sphaerophoria_scripta</i>      | 1 | 1 | 1 |
| <i>Sphaerophoria_taeiniata</i>    | 1 | 1 | 1 |
| <i>Sphaerophoria_virgata</i>      | 1 | 1 | 1 |
| <i>Sphegina_clavata</i>           | 0 | 0 | 1 |
| <i>Sphegina_clunipes</i>          | 0 | 0 | 1 |
| <i>Sphegina_elegans</i>           | 0 | 0 | 1 |
| <i>Sphegina_latifrons</i>         | 0 | 0 | 1 |
| <i>Sphegina_sibirica</i>          | 0 | 0 | 1 |
| <i>Sphegina_sublatifrons</i>      | 0 | 0 | 1 |
| <i>Spilomyia_diopthalma</i>       | 0 | 0 | 1 |
| <i>Syrpitta_pipiens</i>           | 1 | 1 | 1 |
| <i>Syrphus_nitidifrons</i>        | 1 | 1 | 1 |
| <i>Syrphus_ribesii</i>            | 1 | 1 | 1 |
| <i>Syrphus_torvus</i>             | 1 | 1 | 1 |
| <i>Syrphus_vitripennis</i>        | 1 | 1 | 1 |
| <i>Trichopsomyia_flavitaris</i>   | 0 | 0 | 1 |
| <i>Trichopsomyia_joratensis</i>   | 0 | 0 | 1 |
| <i>Volucella_bombylans</i>        | 1 | 1 | 1 |
| <i>Volucella_inanis</i>           | 1 | 1 | 1 |
| <i>Volucella_pellucens</i>        | 1 | 1 | 1 |
| <i>Xanthandrus_comtus</i>         | 1 | 1 | 1 |
| <i>Xanthogramma_citrofasiatum</i> | 0 | 0 | 1 |
| <i>Xanthogramma_dives</i>         | 1 | 1 | 1 |
| <i>Xanthogramma_laetum</i>        | 1 | 1 | 1 |
| <i>Xanthogramma_pedissequum</i>   | 1 | 1 | 1 |
| <i>Xylota_ignava</i>              | 0 | 0 | 1 |



|                                |                  |   |         |
|--------------------------------|------------------|---|---------|
| <i>Xylota_jakutorum</i>        | 0                | 0 | 1       |
| <i>Xylota_segnis</i>           | 1                | 1 | 1       |
| <i>Xylota_sylvarum</i>         | 0                | 0 | 1       |
| <i>Xylota_xanthocnema</i>      | 0                | 0 | 1       |
| <i>Sum of hoverfly species</i> | A+B=336*-170=166 |   | E = 355 |

\*Number of hoverfly species from Miličić et al (2020).

**Table S14.** The list of recent richness of hoverfly species in three designated study sites. 0 indicates the absence of the species, 1 indicates the presence of the species. \* - protected hoverfly species, \*\* strictly protected hoverfly species.

| Hoverfly species                 | Dojkinci1 | Dojkinci2 | Babin zub |
|----------------------------------|-----------|-----------|-----------|
| <i>Baccha elongata</i>           | 0         | 1         | 0         |
| <i>Brachyopa bicolor</i>         | 0         | 1         | 0         |
| <i>Brachyopa maculipennis</i>    | 1         | 1         | 0         |
| <i>Brachypalpus laphriformis</i> | 0         | 1         | 0         |
| <i>Brachypalpus valgus</i>       | 0         | 0         | 1         |
| <i>Cheilosia aerea</i>           | 1         | 1         | 0         |
| <i>Cheilosia albipila</i>        | 1         | 0         | 0         |
| <i>Cheilosia albitarsis</i>      | 1         | 1         | 0         |
| <i>Cheilosia antiqua</i>         | 0         | 1         | 0         |
| <i>Cheilosia barbata</i>         | 0         | 1         | 0         |
| <i>Cheilosia bracus</i>          | 1         | 1         | 0         |
| <i>Cheilosia fasciata</i>        | 0         | 1         | 0         |
| <i>Cheilosia flavipes</i>        | 0         | 1         | 0         |
| <i>Cheilosia frontalis</i>       | 0         | 1         | 0         |
| <i>Cheilosia gigantea</i>        | 0         | 1         | 1         |
| <i>Cheilosia himantopa</i>       | 1         | 1         | 0         |
| <i>Cheilosia himantopus</i>      | 1         | 0         | 0         |
| <i>Cheilosia illustrata</i>      | 0         | 1         | 0         |
| <i>Cheilosia impressa</i>        | 1         | 1         | 1         |
| <i>Cheilosia laticornis</i>      | 0         | 0         | 1         |
| <i>Cheilosia lenis</i>           | 0         | 1         | 0         |
| <i>Cheilosia lenta</i>           | 0         | 1         | 0         |
| <i>Cheilosia melanura</i>        | 0         | 1         | 0         |
| <i>Cheilosia mutabilis</i>       | 1         | 1         | 0         |
| <i>Cheilosia nebulosa</i>        | 0         | 1         | 0         |
| <i>Cheilosia nigripes</i>        | 1         | 1         | 1         |
| <i>Cheilosia orthotricha</i>     | 0         | 1         | 0         |
| <i>Cheilosia pagana</i>          | 1         | 1         | 0         |
| <i>Cheilosia personata</i> *     | 0         | 1         | 0         |
| <i>Cheilosia proxima</i>         | 1         | 1         | 0         |
| <i>Cheilosia ranunculi</i>       | 1         | 1         | 0         |
| <i>Cheilosia rhynchops</i>       | 0         | 1         | 0         |
| <i>Cheilosia scutellata</i>      | 1         | 1         | 0         |
| <i>Cheilosia soror</i>           | 0         | 1         | 0         |
| <i>Cheilosia subpictipennis</i>  | 1         | 0         | 0         |
| <i>Cheilosia urbana</i>          | 1         | 1         | 0         |
| <i>Cheilosia variabilis</i>      | 1         | 1         | 0         |
| <i>Cheilosia vernalis</i>        | 1         | 1         | 0         |

|                                  |   |   |   |
|----------------------------------|---|---|---|
| <i>Cheilosia vicina</i>          | 0 | 1 | 0 |
| <i>Cheilosia vulpina</i>         | 1 | 1 | 0 |
| <i>Chrysogaster solstitialis</i> | 0 | 1 | 0 |
| <i>Chrysotoxum arcuatum</i>      | 0 | 0 | 1 |
| <i>Chrysotoxum bicinctum</i>     | 1 | 1 | 0 |
| <i>Chrysotoxum elegans</i>       | 1 | 1 | 1 |
| <i>Chrysotoxum fasciatum</i>     | 0 | 0 | 1 |
| <i>Chrysotoxum festivum</i>      | 1 | 1 | 1 |
| <i>Chrysotoxum octomaculatum</i> | 1 | 0 | 0 |
| <i>Chrysotoxum tomentosum</i>    | 0 | 0 | 1 |
| <i>Criorhina asilica</i>         | 1 | 1 | 0 |
| <i>Dasysyrphus albostratus</i>   | 0 | 1 | 0 |
| <i>Dasysyrphus friuliensis</i>   | 0 | 1 | 0 |
| <i>Dasysyrphus postclaviger</i>  | 1 | 1 | 0 |
| <i>Dasysyrphus tricinctus</i>    | 0 | 1 | 0 |
| <i>Dasysyrphus venustus</i>      | 0 | 1 | 0 |
| <i>Epistrophe diaphana</i>       | 1 | 1 | 0 |
| <i>Epistrophe eligans</i>        | 0 | 1 | 0 |
| <i>Epistrophe flava</i>          | 0 | 1 | 0 |
| <i>Epistrophe grossulariae</i>   | 0 | 1 | 0 |
| <i>Epistrophe melanostoma</i>    | 1 | 1 | 0 |
| <i>Epistrophe nitidicollis</i>   | 0 | 1 | 0 |
| <i>Epistrophella euchroma</i>    | 0 | 1 | 0 |
| <i>Episyrphus balteatus</i>      | 0 | 1 | 1 |
| <i>Eristalis interrupta</i>      | 0 | 1 | 0 |
| <i>Eristalis jugorum</i>         | 0 | 1 | 0 |
| <i>Eristalis rupium</i>          | 0 | 1 | 0 |
| <i>Eristalis similis</i>         | 0 | 1 | 0 |
| <i>Eristalis tenax</i>           | 0 | 1 | 1 |
| <i>Eumerus ornatus</i>           | 0 | 0 | 1 |
| <i>Eumerus sogdianus</i>         | 0 | 1 | 0 |
| <i>Eupeodes corollae</i>         | 1 | 1 | 1 |
| <i>Eupeodes flaviceps</i>        | 0 | 0 | 1 |
| <i>Eupeodes lapponicus</i>       | 1 | 1 | 1 |
| <i>Eupeodes latifasciatus</i>    | 0 | 1 | 0 |
| <i>Eupeodes luniger</i>          | 1 | 1 | 1 |
| <i>Eupeodes nielsenii</i>        | 0 | 1 | 0 |
| <i>Eupeodes nitens</i>           | 1 | 1 | 0 |
| <i>Heringia pubescens</i>        | 0 | 1 | 0 |
| <i>Leucozona lucorum</i>         | 0 | 0 | 1 |
| <i>Melangyna compositarum</i>    | 0 | 1 | 0 |
| <i>Melangyna lasiophthalma</i>   | 1 | 1 | 0 |
| <i>Melanostoma mellinum</i>      | 1 | 1 | 1 |
| <i>Melanostoma scalare</i>       | 1 | 1 | 0 |
| <i>Meligramma cincta</i>         | 0 | 1 | 0 |
| <i>Meligramma guttata</i>        | 0 | 1 | 0 |
| <i>Meliscaeva auricollis</i>     | 0 | 1 | 1 |
| <i>Merodon aerarius</i>          | 0 | 1 | 1 |
| <i>Merodon armipes</i>           | 0 | 1 | 1 |

|                                    |   |   |   |
|------------------------------------|---|---|---|
| <i>Merodon aureus</i>              | 0 | 0 | 1 |
| <i>Merodon balkanicus</i>          | 0 | 0 | 1 |
| <i>Merodon bessarabicus</i>        | 0 | 1 | 0 |
| <i>Merodon calidus</i>             | 0 | 0 | 1 |
| <i>Merodon cinereus</i>            | 0 | 0 | 1 |
| <i>Merodon desuturinus</i> **      | 0 | 1 | 0 |
| <i>Merodon moenium</i>             | 1 | 1 | 1 |
| <i>Merodon obscuritarsis</i>       | 0 | 1 | 1 |
| <i>Microdon devius</i>             | 0 | 1 | 0 |
| <i>Microdon mutabilis</i>          | 1 | 1 | 1 |
| <i>Myathropa florea</i>            | 1 | 0 | 0 |
| <i>Myolepta potens</i> *           | 1 | 0 | 0 |
| <i>Neoascia meticulosa</i>         | 0 | 1 | 0 |
| <i>Neoascia obliqua</i>            | 0 | 1 | 0 |
| <i>Neoascia unifasciata</i>        | 0 | 1 | 0 |
| <i>Neocnemodon larusi</i>          | 1 | 1 | 0 |
| <i>Paragus haemorrhous</i>         | 0 | 1 | 0 |
| <i>Parasyrphus annulatus</i>       | 0 | 0 | 1 |
| <i>Parasyrphus lineolus</i>        | 0 | 1 | 1 |
| <i>Parasyrphus macularis</i>       | 0 | 1 | 0 |
| <i>Parasyrphus punctulatus</i>     | 0 | 1 | 0 |
| <i>Pipizella divicoi</i>           | 0 | 1 | 0 |
| <i>Pipizella viduata</i>           | 1 | 1 | 0 |
| <i>Platycheirus albimanus</i>      | 0 | 1 | 1 |
| <i>Platycheirus melanopsis</i>     | 0 | 0 | 1 |
| <i>Platycheirus scutatus</i>       | 1 | 1 | 0 |
| <i>Platycheirus splendidus</i>     | 0 | 1 | 0 |
| <i>Rhingia campestris</i>          | 0 | 1 | 0 |
| <i>Scaeva pyrastris</i>            | 0 | 0 | 1 |
| <i>Scaeva selenitica</i>           | 0 | 1 | 0 |
| <i>Sphaerophoria scripta</i>       | 0 | 1 | 1 |
| <i>Sphegina latifrons</i>          | 0 | 1 | 0 |
| <i>Sphegina sublatifrons</i>       | 0 | 1 | 0 |
| <i>Syrpitta pipiens</i>            | 1 | 0 | 0 |
| <i>Syrphus ribesii</i>             | 0 | 1 | 1 |
| <i>Syrphus torvus</i>              | 1 | 1 | 1 |
| <i>Syrphus vitripennis</i>         | 0 | 1 | 0 |
| <i>Temnostoma bombylans</i>        | 1 | 0 | 0 |
| <i>Volucella bombylans</i>         | 1 | 1 | 1 |
| <i>Volucella inflata</i>           | 0 | 1 | 0 |
| <i>Xanthandrus comtus</i>          | 0 | 1 | 0 |
| <i>Xanthogramma citrofasciatum</i> | 0 | 1 | 0 |
